# Supplementary material for: Semitransparent polymer-based solar cells via simple wet lamination process with TiO2 layer using automatic spray layer-by-layer method
Source: Royal Society of Chemistry journal article supplement (doi:10.1039/c5ra05762k), 2015-01-01
Supplement: c5ra05762k1.pdf [file c5ra05762k1.pdf]

# Supporting Information

## **Fabrication of TiO<sub>2</sub> Layer by Spray Layer-by-Layer for Electron Transport Layer in Bulk Heterojunction Solar Cells**

**Atthaporn Ariyarit, Kengo Manabe, Kenta Fukada, Kouji Fujimoto, Kyu-Hong Kyung and Seimei Shiratori \***

**Graduate School of Science and Technology, Keio University, 3-14-1,  
Hiyoshi, Kouhoku-ku, Yokohama 223-8522, Japan**

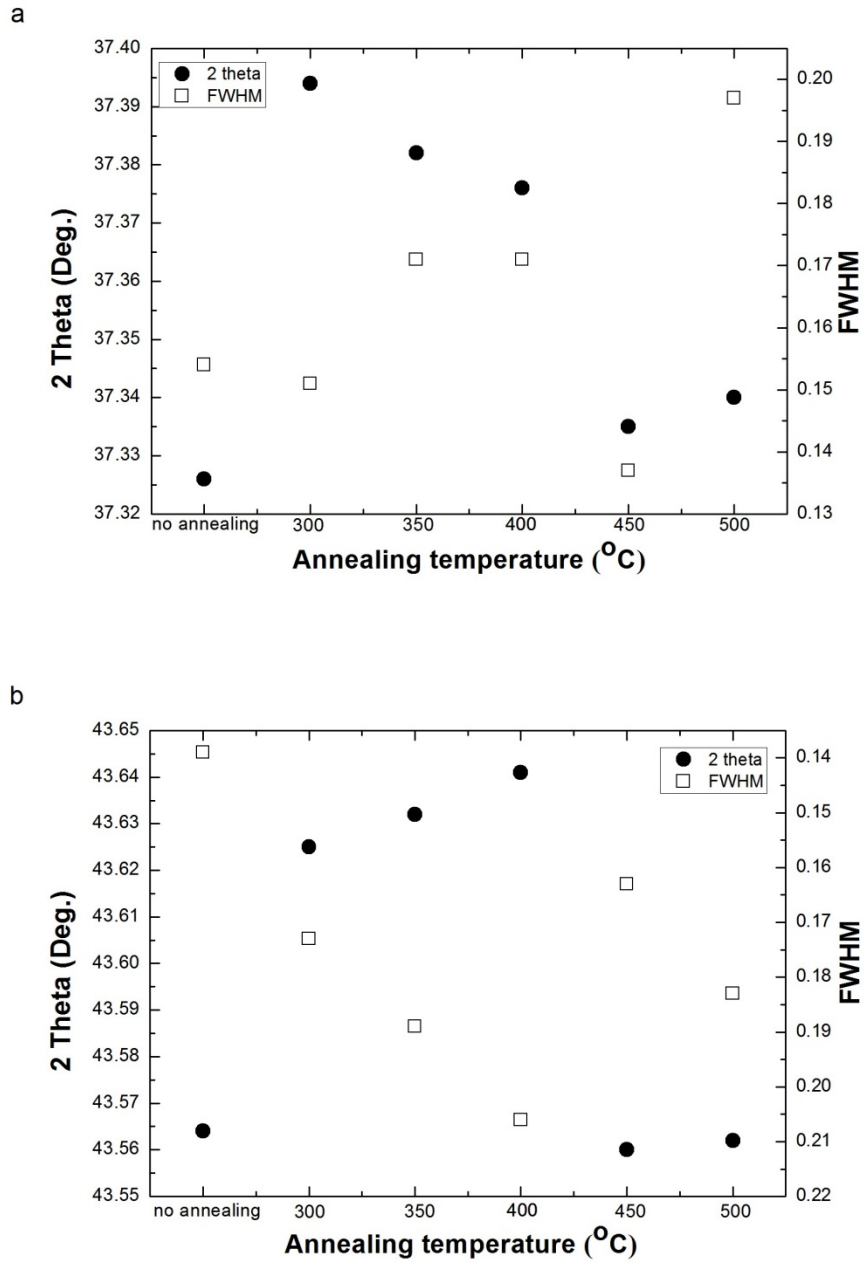

Figure SS1. 2 theta and FWHM of (a) TiO<sub>2</sub> anatase phase and (b) TiO<sub>2</sub> rutile phase when fabricated with Spray LBL on glass and annealing at difference temperature

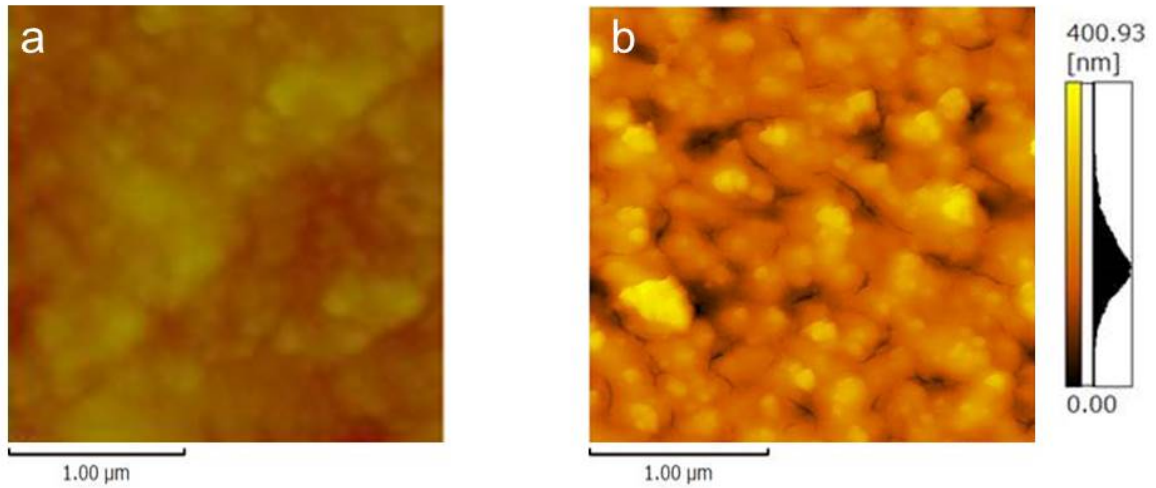

Figure SS2. AFM image of (a) FTO layer, Rms of surface=32 nm (b) TiO<sub>2</sub> layer on FTO when fabricated with Spray LBL and annealing at 450 °C, Rms of surface=50 nm

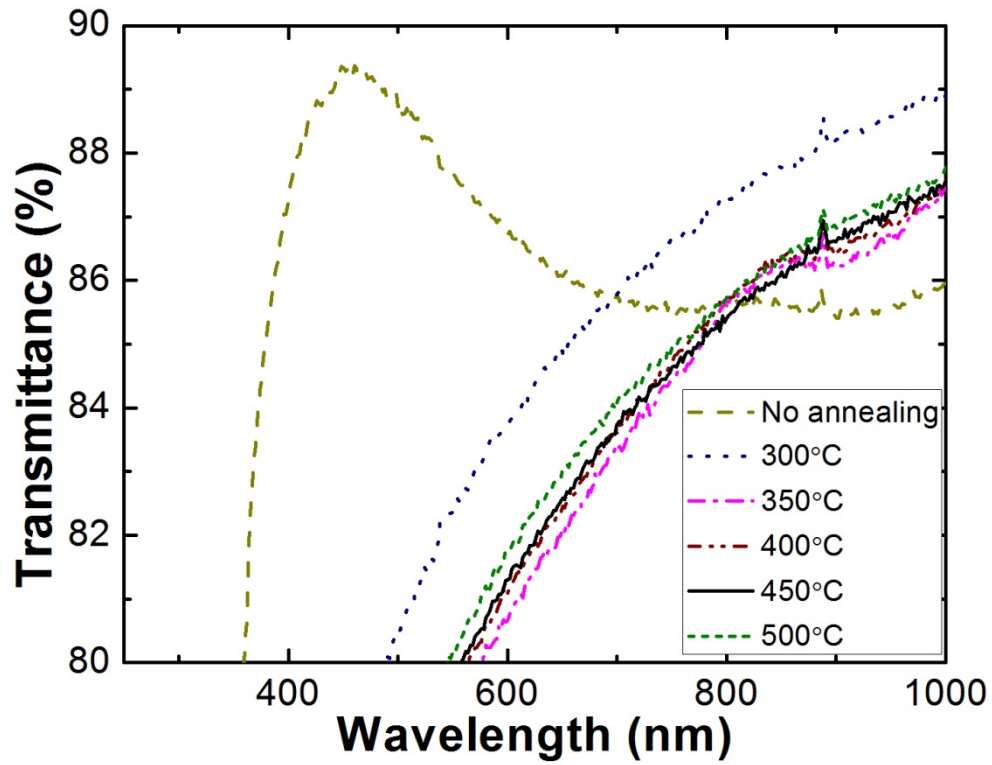

Figure SS3. Transmittance of TiO<sub>2</sub> layer fabricate by spray LBL technique on glass substrate and annealing with difference temperature

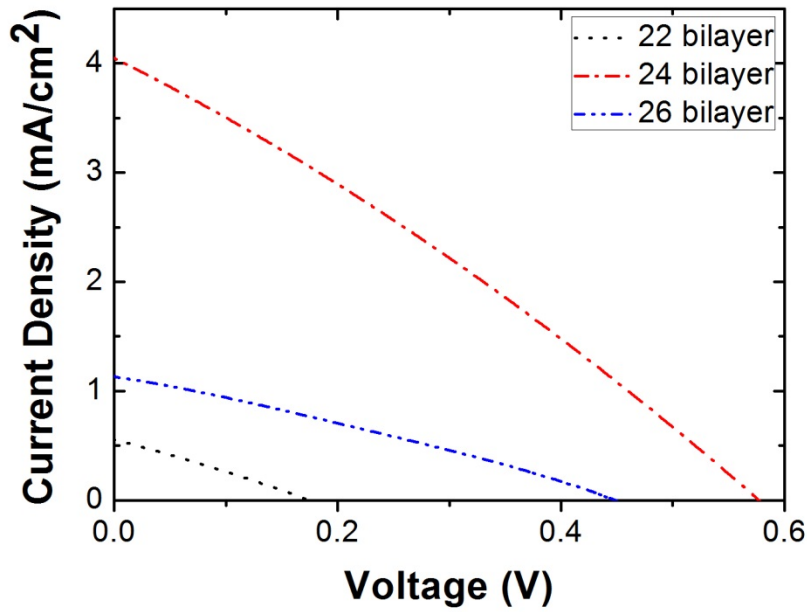

Figure SS4. The Current density –Voltage characteristic of bulk heterojunction solar cells when fabricate the electron transport layer by spray-LBL without annealing and change the thickness of TiO<sub>2</sub> layer by changing number of bilayers.

Table S1 Haze value and transmittance of FTO, TiO<sub>2</sub>/FTO and TiO<sub>2</sub>/FTO after annealing at 450 °C

|                                       | Transmittance (%) | Haze (%) |
|---------------------------------------|-------------------|----------|
| FTO                                   | 79.81             | 13.61    |
| TiO <sub>2</sub> /FTO                 | 81.1              | 19.31    |
| TiO <sub>2</sub> /FTO after annealing | 79.3              | 22.1     |

Table S2 The properties of solar cell when fabricated the electron transport layer with spray-LBL method without annealing and change the number of bilayer

| Number of bilayer | Jsc (mA/sq.) | Voc (V) | FF    | Eff (%) | TiO <sub>2</sub> Thickness (nm) |
|-------------------|--------------|---------|-------|---------|---------------------------------|
| 20                | -            | -       | -     | -       | 100                             |
| 22                | 0.55         | 0.18    | 0.275 | 0.027   | 110                             |
| 24                | 4.02         | 0.58    | 0.302 | 0.704   | 120                             |
| 26                | 1.13         | 0.46    | 0.295 | 0.153   | 130                             |

## Fitting J-V graph via MATLAB program

We use one diode model to fitting the graph of J-V characteristic to estimates parameters : series resistance( $R_s$ ), shunt resistance( $R_{sh}$ ), ideality factor( $n$ ), saturation current density ( $J_0$ ) and photo current density ( $J_{ph}$ ) by using equation S5. When the x axis is Voltage and y axis is current density. The equivalent circuit was shows in Figure SS5, flow chart for graph fitting show in Figure SS6, example of graph fitting show in Figure SS7.

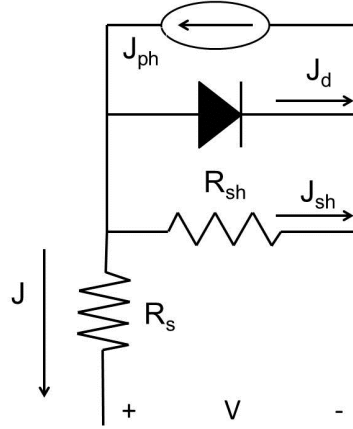

Figure SS5 Equivalent circuit of one diode model

From Figure SS4, the output current can write in equation:

$$J = J_{ph} - J_d - J_{sh} \quad (S1)$$

When

$$J_d = J_0 \left( e^{\frac{q(V + JR_s)}{n_1 kT}} - 1 \right) \quad (S2)$$

And

$$J_{sh} = (V + JR_s) / R_{sh} \quad (S3)$$

Replace S2 and S3 in S1;

$$J = J_{ph} - J_0 \left( e^{\frac{q(V + JR_s)}{nkT}} - 1 \right) - (V + JR_s) / R_{sh} \quad (S4)$$

$$0 = J_{ph} - J_0 \left( e^{\frac{q(V + JR_s)}{nkT}} - 1 \right) - \frac{V + JR_s}{R_{sh}} - J \quad (S5)$$

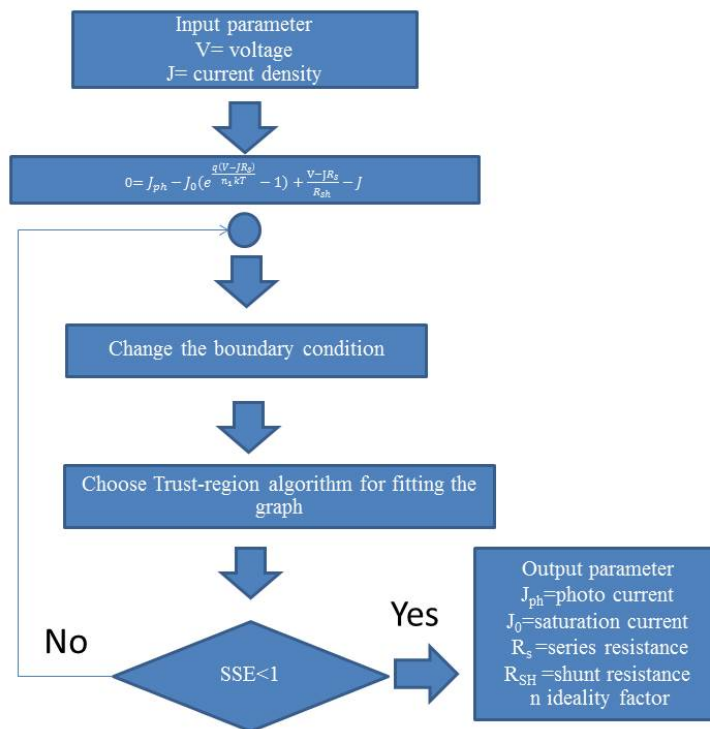

Figure SS6 Figure SS5 Flow chart for fitting parameter:  $R_s$ ,  $R_{sh}$ ,  $n$ ,  $J_0$  and  $J_{ph}$  by using one diode model with Trust-region algorithm.

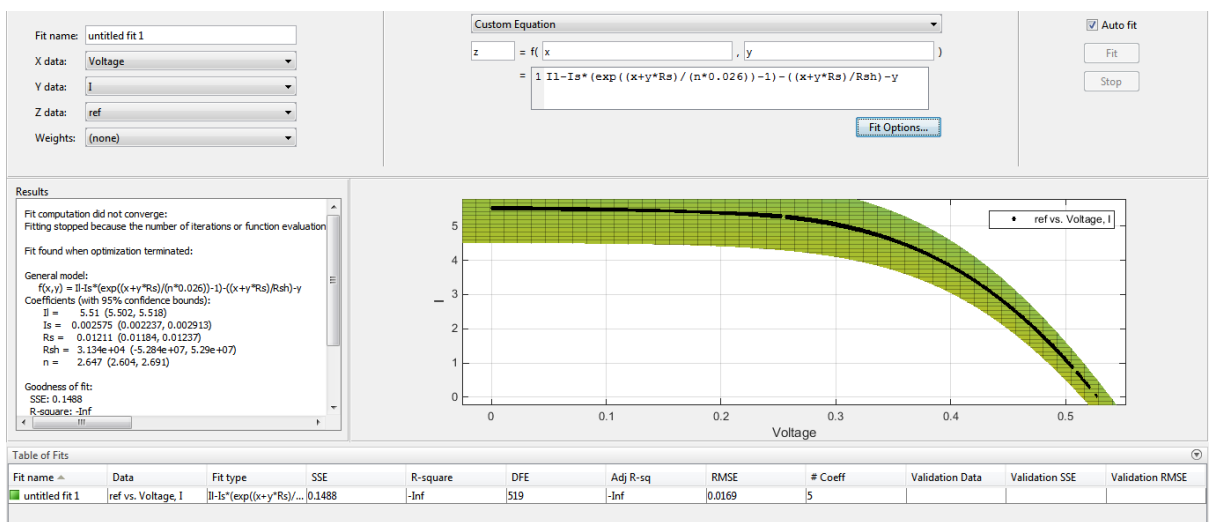

Figure SS7 Example of graph fitting via cftool in Matlab program. X data is voltage, Y data is current density and ref is 0.
